# 1 Social network and household exposure explain the use of malaria prevention measures in 2 rural communities of Meghalaya, India

3  
4 Elisa Bellotti<sup>1</sup>, Andras Voros<sup>2</sup>, Mattimi Passah<sup>4</sup>, Quinnie Doreen Nongrum<sup>4</sup>, Carinthia Balabet  
5 Nengnong<sup>4</sup>, Charishma Khongwir<sup>4</sup>, Annemieke van Eijk<sup>3</sup>, Anne Kessler<sup>3</sup>, Rajiv Sarkar<sup>4</sup>, Jane M.  
6 Carlton<sup>3</sup>, Sandra Albert<sup>4</sup>

7  
8 <sup>1</sup>Department of Sociology, University of Manchester, Manchester, UK

9 <sup>2</sup>School of Social Policy, University of Birmingham, Birmingham, UK

10 <sup>3</sup>Center for Genomics and Systems Biology, Department of Biology, New York University, USA

11 <sup>4</sup>Indian Institute of Public Health Shillong, Shillong, Meghalaya, India

12  
13 Correspondence: Elisa Bellotti e-mail: [Elisa.Bellotti@manchester.ac.uk](mailto:Elisa.Bellotti@manchester.ac.uk); Sandra Albert e-mail:  
14 [sandra.albert@iiphs.ac.in](mailto:sandra.albert@iiphs.ac.in)

15  
16 Malaria remains a global concern despite substantial reduction in incidence over the past  
17 twenty years. Public health interventions to increase the uptake of preventive measures have  
18 contributed to this decline but their impact has not been uniform. To date, we know little  
19 about what determines the use of preventive measures in rural, hard-to-reach populations,  
20 which are crucial contexts for malaria eradication. We collected detailed interview data on  
21 the use of malaria preventive measures, health-related discussion networks, individual  
22 characteristics, and household composition in ten tribal, malaria-endemic villages in  
23 Meghalaya, India in 2020-2021 (n=1,530). Employing standard and network statistical  
24 models, we found that social network and household exposure were consistently positively  
25 associated with preventive measure use across villages. Network and household exposure  
26 were also the most important factors explaining behaviour, outweighing individual  
27 characteristics, opinion leaders, and network size. These results suggest that real-life data on  
28 social networks and household composition should be considered in studies of health-  
29 behaviour change.

## 30 INTRODUCTION

31 Following a substantial reduction in the global incidence of malaria between 2001 and 2015,  
32 the World Health Organization set a goal of global eradication by 2030 [WHO, 2015]. While  
33 large-scale interventions played a pivotal role in controlling and eliminating malaria in some  
34 countries, their impact has varied across the malarious world, resulting in little change for  
35 poor, migrant, and hard-to-reach populations [WHO, 2015]. Prevention in residual epicentres  
36 is challenging unless local populations are engaged [Dhiman, 2019]. Treating difficult pockets  
37 of transmission requires tailored and targeted approaches suited to local contexts [Gosling et  
38 al., 2020]. This is true for Meghalaya state in Northeastern India, a hilly and mountainous  
39 area of subtropical rain forests interspersed with rice-agroecosystems. The wet climate  
40 makes Meghalaya an optimal setting for malaria, with multiple *Anopheles* mosquito species  
41 transmitting *Plasmodium falciparum* and *Plasmodium vivax* malaria parasites [Kessler et al.,  
42 2018; Kessler et al., 2021]. Meghalaya is inhabited mostly by tribal peoples, with 86% of its  
43 population of approximately 3.2 million belonging to an indigenous ethnicity or Scheduled

**NOTE: This preprint reports new research that has not been certified by peer review and should not be used to guide clinical practice.**

44 Tribes as referred to by the government of India [Rajagopal, 1976; Lele et al., 2009; Ministry  
45 of Tribal Affairs, 2021]. ‘Tribals’ often experience geographical marginalization, poor access to  
46 health care, and low socio-economic status [Rajagopal, 1976; Sharma et al. 2015; Kessler et  
47 al., 2018], environmental and social factors that pose a challenge to malaria prevention  
48 efforts. In Meghalaya, large-scale malaria prevention efforts are coordinated by modern,  
49 government-run public health programmes managed through local Primary Health Centres  
50 (PHC) and facilitated at the village level by Accredited Social Health Activists (ASHAs). These  
51 operate alongside largely undocumented traditional tribal treatments provided by Traditional  
52 Healers [Albert et al., 2015].

53 Large-scale malaria prevention measures in Meghalaya have mainly focused on reducing  
54 mosquito bites [Debboun et al., 2013] through the use of Indoor Residual Spraying (IRS) and  
55 the distribution of Long-Lasting Insecticidal Nets (LLINs), which repel and reduce the  
56 longevity of indoor-feeding and resting of *Anopheles* vector mosquitoes [Mishra et al., 2021].  
57 Both methods have been associated with a substantial reduction in malaria incidence [Sahu  
58 et al., 2020] but are used only indoors [Lek et al., 2020; Sangoro, 2015; Rubio-Palis et al.,  
59 1992]. Villagers working or socializing outside their dwellings, especially in the evening, night,  
60 and early morning, may use other measures to prevent mosquito bites [Sangoro, 2015;  
61 Wilson et al., 2014], such as protective clothing, insect repellent spray or body cream. IRS is  
62 contested in many Meghalayan villages [Sarkar et al., 2021; Passah et al., 2022], where  
63 households could turn to other indoor measures such as air-borne repellents (coils and  
64 vaporizers) instead.

65 Studies that measure the adoption of – or resistance to – mosquito bite prevention methods  
66 usually evaluate how characteristics of individuals or households (gender, education, socio-  
67 economic background, number of children, living conditions, etc.) relate to knowledge and  
68 practice of malaria preventive and treatment behaviours [Nlinwe et al., 2021; Matin et al.,  
69 2020; Van Eijk et al., 2016; Shahandeh et al., 2012]. What these studies do not consider is that  
70 information and attitudes regarding both effective and ineffective preventive behaviours are  
71 likely to spread through social networks. These may facilitate support for but also resistance  
72 to new practices. Such often-overlooked network processes can help explain why some  
73 effective practices, like the use of vaporisers, may become common in certain areas [Van Eijk  
74 et al., 2016] while others, like IRS, may be opposed [Sarkar et al., 2021; Passah et al., 2022],  
75 or why practices whose effectiveness is unproven, like burning egg trays and jute bags, may  
76 thrive.

77 Social network research is increasingly becoming common in the study of adoption of health  
78 behaviours, including eating habits [Salvy et al., 2012], physical activity [Proestakis et al.,  
79 2018], family planning [Gayen et al., 2010; Stoebenau et al., 2003], healthy practices [Kim et  
80 al., 2015], and general diffusion of information and innovations [Rogers Everett, 1962;  
81 Coleman et al., 1957; Valente, 1996; Valente 2010; Centola; 2010; Centola, 2018]. Threshold  
82 models postulate that individuals adopt innovative behaviours depending on the proportion  
83 of the population already engaged in such behaviours [Granovetter, 1978]. They further  
84 propose that individuals comfortable with a low threshold adopt a behaviour earlier than  
85 others, while late adopters require a higher threshold. Threshold models are efficient in

86 predicting simple contagion, for which proximity – being close to infected subjects – is  
87 enough to trigger diffusion [Watts et al., 1998; Centola, 2010]. However, behaviours are  
88 complex phenomena that do not spread across networks in the same way an airborne  
89 disease might [Centola and Macy, 2007]. Adopting a behaviour like burning coils or jute bags  
90 is influenced both by locals who use these preventive measures as well as those who do not  
91 use them because they consider them ineffective or explicitly oppose them [Centola; 2010;  
92 Centola, 2018]. To be diffused, innovations need to be adopted and reinforced within local  
93 neighbourhoods of social networks [Coleman et al., 1957; Valente, 1996; Valente 2010;  
94 Centola; 2010; Centola, 2018].

95 A network exposure model of diffusion [Coleman et al., 1957; Valente, 1996; Valente 2010;  
96 Centola, 2018] does not measure the threshold level of the entire population but rather, the  
97 threshold level of the proportion of adopters within the population that individuals are  
98 directly related to. It postulates that innovative behaviour spreads relatively quickly within  
99 highly clustered and homophilous regions of the networks [Christakis and Fowler, 2007;  
100 Smith et al., 2008; Crosnoe et al., 2008; Valente et al., 2009] but the spreading slows down  
101 where such clusters are disconnected [Centola, 2011]. Central actors such as persons with  
102 numerous contacts [Freeman 1979] may not be the best located actors to promote diffusion  
103 of new practices. They are usually considered opinion leaders and champions of the status  
104 quo who are reluctant to change the way things are done within a community [Valente and  
105 Pumpang 2007]. Innovations are more likely to spin off from peripheries of social networks,  
106 where people are less constrained by collective social norms, are more likely to be connected  
107 through non-redundant weak ties, and therefore are potentially more exposed to norms of  
108 different groups [Granovetter 1978, Burt 2004].

109 Most studies that model diffusion of diseases or information use secondary [Weston et al.,  
110 2018] or synthetic data [Horsevad et al., 2022] to calibrate or validate models [Verelst et al.,  
111 2016; Bedson et al. 2021]. Social network information is at best inferred from physical  
112 proximity [Levy et al., 2021]. Studies that collect primary social network data, especially from  
113 remote, hard-to-reach tribal villages, are very rare [Guyen et al., 2010; Stoebenau et al.,  
114 2003; Kim et al. 2015; Holly et al., 2014; Koster, 2011]. This is so because social network data  
115 need to be gathered from the entire population of interest [Smith et al., 2008; Perkins et al.,  
116 2015] with minimal missing data, which is a huge challenge in hard-to-reach populations  
117 where individuals spend most of the day working outdoors. To guarantee coverage, the  
118 population of interest must be identified and bounded [Smith et al., 2008; Marsden, 2002],  
119 while acknowledging that boundaries are always arbitrary. In practice, an individual's social  
120 network extends beyond the village they live in, even in remote areas [Stoebenau and  
121 Valente 2003; Koster 2011].

122 Once populations have been identified and bounded, and data have been collected, social  
123 network analysis can be used to study the links between the structure of networks and the  
124 behaviours of its actors. This requires specialised statistical techniques [Steglich et al., 2010],  
125 since dependencies in networks and between networks and behaviour violate the  
126 independence assumption at the core of most standard (non-network) statistical methods  
127 [Bartels et al., 1979; Doreian 1980; Dow et al., 1983; Dow et al., 1984; Ord 1975; Leenders

128 2002]. The Stochastic Actor-oriented Model (SAOM) is one of the few methods suitable to  
129 analyse the dynamics of social networks and individual behaviour [Snijders et al., 2010]. The  
130 SAOM is increasingly popular in the social sciences and has been applied in the context of  
131 various health behaviours in recent years [adams and Schaefer, 2017; de la Haye et al., 2019;  
132 Long and Valente, 2019; Franken et al., 2023]. Despite successful applications of network  
133 models, empirical data in the area of disease prevention, and specifically malaria prevention,  
134 are still predominantly analysed with non-network methods [Nlinwe et al., 2021; Matin et al.,  
135 2020; Van Eijk et al., 2016; see Musoke et al. 2023 for a review].

136 In this study, we assess the importance of social networks in explaining the use of eight  
137 mosquito bite preventive measures in ten hard-to-reach tribal villages in northeast India. We  
138 compare the role of five groups of factors affecting villagers' use of the preventive measures:  
139 individual characteristics, influence from village opinion leaders, social network size (within  
140 and outside villages), network exposure, and household exposure. We first examine which  
141 factors explain the use of each preventive measure by fitting village-level logistic regression  
142 models. In the results, we present the meta-analysis of all models (Snijders et al. 2012), which  
143 shows the significant variables, across villages, in explaining the use of each preventive  
144 measure. We then apply stationary Stochastic Actor-oriented Models [Snijders and Steglich,  
145 2015], an extension of SAOMs for cross-sectional data observed at a single time point, to  
146 jointly model individuals' use of preventive measures and their social relations with other  
147 villagers. In this step, we consider villagers' use of any measure, treating the system of social  
148 ties and measure use as a multilevel network (Lazega and Snijders, 2015:36-37). While our  
149 data is cross-sectional, the SAOM is dynamic in nature and allows inference to social  
150 processes that can explain the observed patterns of social ties, preventive behaviour,  
151 individual attributes, and household structure (see the Methods section for further details).  
152 To our knowledge, this is the first study where a social network analysis approach is used in  
153 the context of mosquito bite prevention. To date, stationary SAOMs have not been fitted to  
154 multilevel network data in the scholarly literature, while we know of only two applications of  
155 the method to a single network, both outside of the area of health-related behaviours  
156 [Snijders and Steglich, 2015; Simpson 2022]. Similar to the logistic regression models, in the  
157 results we present the meta-analysis of all SAOM models. Details of the meta-analysis  
158 procedure can be found in the Method section, while full logistic and SAOM models results  
159 are reported in the Supplementary Information, Tables 12-19 and Appendix E, Tables 41-44.

160 We apply the above models to data we collected in the state of Meghalaya in India between  
161 January 2020 and August 2021. Data is available from ten villages in three districts: three  
162 villages in West Khasi Hills (WK1, WK2, WK3), three villages in West Jaintia Hills (WJ1, WJ2,  
163 WJ3), and four villages in South Garo Hills (SG1, SG2, SG3, SG4). In these areas, detailed  
164 malaria epidemiological and behavioural information has only recently been generated  
165 [Kessler et al., 2018; Kessler et al., 2021]. See **Figure 1** for the geographic context of our study  
166 sites.

## Map of Meghalaya

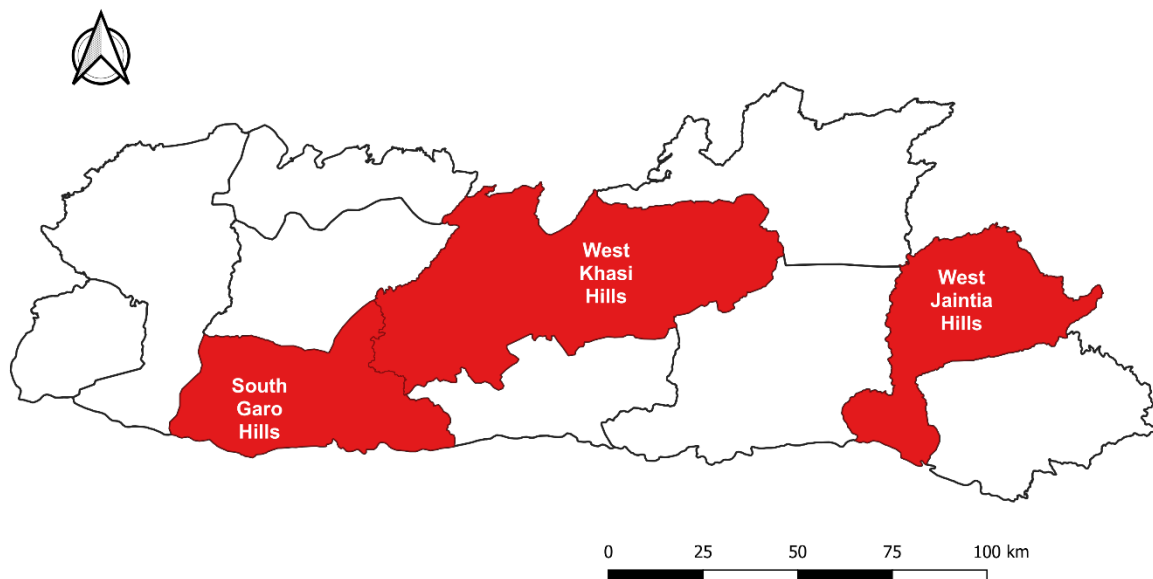

167

168 **Figure 1:** The map of Meghalaya state in Northeast India with the three studied districts  
169 highlighted.

170 A structured questionnaire was administered to every reachable adult ( $\geq 18$  years old) in the  
171 studied villages, resulting in information from 1,530 villagers residing in 766 households.  
172 From each participant, we collected information about: (1) use of mosquito bite preventive  
173 measures (LLINs, covering clothes, boots, gloves, insecticide cream, coils, vaporizers, burning  
174 materials), (2) demographic characteristics and role(s) within household and village, (3)  
175 health-related discussion network within and outside village, and (4) household membership.  
176 The ASHA was interviewed in all 10 villages, and in the six villages where present, the  
177 Traditional Healer was also interviewed. Both the ASHA and the Traditional Healer are  
178 considered opinion leaders for their health-related expertise and their role in administering  
179 healthcare within villages. The full list of questions, details on coding and variable descriptives  
180 are reported in the Supplementary Information, Appendix B, Tables B1-B15.

181 By interviewing most adults in each village, we can quantify how many of the people a  
182 villager talks to about health-related matters use a given preventive measure – we refer to  
183 this as *network exposure*. Similarly, the number of household members using a preventive  
184 measure defines a villager's *household exposure* to this measure. **Figure 2** provides an  
185 illustrative example for network exposure to the use of coils, based on data from one of the  
186 villages; household exposure may be conceived similarly. We use this conceptualisation of  
187 exposure in the first part of our analysis, as it is compatible with standard logistic regression  
188 models. **Figure 3** provides a different view on exposure that allows to consider all preventive  
189 measures at once: for the same village, it presents measure use and discussion ties as a

190 **multilevel network.** In this network, ties representing usage connect villagers to any measure  
191 they report using and discussion ties connect villagers to each other. We use this  
192 conceptualisation in the second part of our analysis, as it allows to study patterns of use and  
193 discussion across measures in SAOMs.

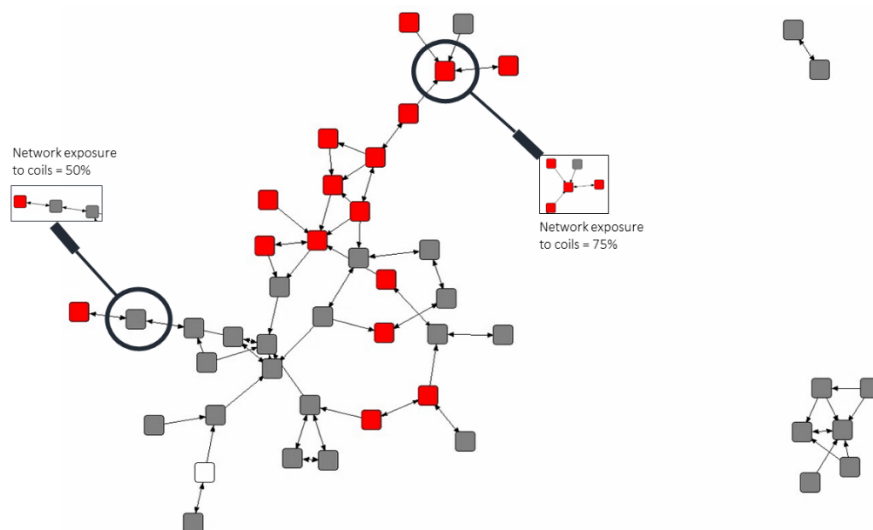

194  
195 **Figure 2:** Example of percentage of exposure to the use of coils in WK2. Nodes represent  
196 interviewed villagers; lines represent whom the villagers talk to about health-related matters;  
197 red nodes indicate villagers who use coils; grey nodes indicate villagers who do not use coils.  
198 Network exposure to coils of the node highlighted at the top right = 75%. Network exposure  
199 to coils of the node highlighted at the left = 50%.

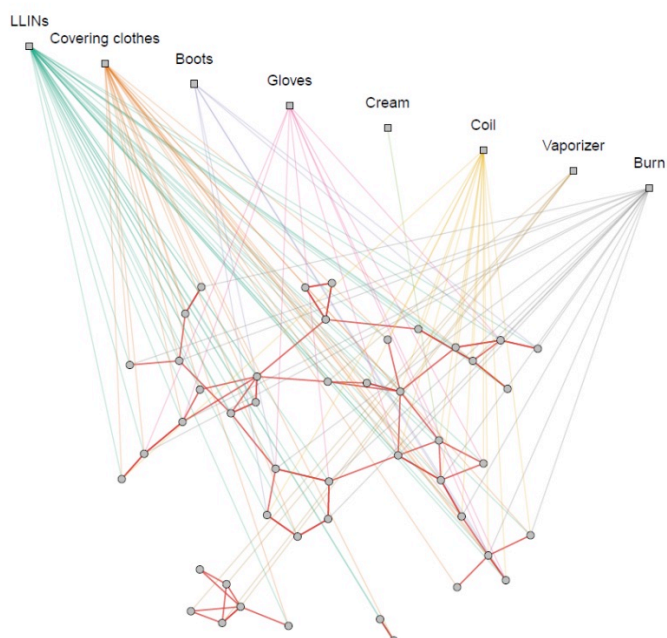

200  
201 **Figure 3:** Multilevel network of people by people talking about health-related matters and  
202 using preventive measures in WK2. Appendix C in the Supplementary information (Figures  
203 C1-C10) reproduces multilevel network visualizations for each village.



204 RESULTS

205 Factors associated with the use of different preventive measures

206 Results of meta-analyses of village-level logistic regressions explaining the use of each  
 207 preventive measure are reported in **Table 1**. The table presents estimates of population  
 208 parameters ( $\mu$ ) and standard errors (SE) of variables that were retained through backward  
 209 model selection performed separately for each preventive measure. See the Methods section  
 210 for details about variable selection and meta-analysis models. Heterogeneity statistics for  
 211 estimates are reported in the Supplementary Information (Appendix D, Tables D19-D26).

|                                |                          |       | LLINs   | Covering clothes | Boots    | Gloves   | Insecticide cream | Coils   | Vaporizers | Burn materials |
|--------------------------------|--------------------------|-------|---------|------------------|----------|----------|-------------------|---------|------------|----------------|
| A                              | Intercept                | $\mu$ | 0.61    | -0.96*           | -1.51*** | -2.78*** | -2.93***          | -1.25*  | -3.06***   | -1.56***       |
|                                |                          | SE    | (0.6)   | (0.42)           | (0.35)   | (0.61)   | (0.64)            | (0.62)  | (0.51)     | (0.16)         |
| B                              | Female                   | $\mu$ |         |                  | -1.15*** |          |                   |         |            |                |
|                                |                          | SE    |         |                  | (0.28)   |          |                   |         |            |                |
|                                | Head of household        | $\mu$ |         | -0.28            |          |          |                   |         | 0.10       |                |
|                                |                          | SE    |         | (0.21)           |          |          |                   |         | (0.87)     |                |
|                                | Carer for a sick person  | $\mu$ |         |                  |          |          |                   | 0.71    |            |                |
|                                |                          | SE    |         |                  |          |          |                   | (0.47)  |            |                |
|                                | Work in fields           | $\mu$ |         |                  |          |          | 0.04              | -0.61*  |            |                |
| SE                             |                          |       |         |                  |          | (0.34)   | (0.26)            |         |            |                |
| Age                            | $\mu$                    |       |         |                  |          | 0.00     |                   |         |            |                |
|                                | SE                       |       |         |                  |          | (0.17)   |                   |         |            |                |
| Education                      | $\mu$                    |       |         |                  | 0.21     | 0.24**   | 0.10              |         |            |                |
|                                | SE                       |       |         |                  | (0.18)   | (0.09)   | (0.09)            |         |            |                |
| C                              | Talks to Asha            | $\mu$ |         | 0.38             |          |          |                   |         |            |                |
|                                |                          | SE    |         | (0.33)           |          |          |                   |         |            |                |
| D                              | Network size in village  | $\mu$ |         | 0.10             |          | -0.22    |                   | -0.12   |            |                |
|                                |                          | SE    |         | (0.13)           |          | (0.22)   |                   | (0.19)  |            |                |
|                                | Network size out village | $\mu$ |         | 0.32***          |          |          |                   |         |            |                |
|                                | SE                       |       | (0.10)  |                  |          |          |                   |         |            |                |
| E                              | Network exposure         | $\mu$ | 2.21*** | 1.04***          | 1.39***  |          |                   | 1.81*** | 1.25       | 1.06*          |
|                                |                          | SE    | (0.38)  | (0.28)           | (0.26)   |          |                   | (0.48)  | (1.01)     | (0.46)         |
| F                              | Household exposure       | $\mu$ | 0.39    | 0.56**           | 1.04***  | 2.08***  | 1.98***           | 1.07**  | 2.38***    | 0.98***        |
|                                |                          | SE    | 0.42    | (0.21)           | (0.18)   | (0.56)   | (0.31)            | (0.41)  | (0.31)     | (0.33)         |
| Number of village-level models |                          |       | 8       | 10               | 9        | 6        | 7                 | 9       | 4          | 8              |

212 **Table 1:** Results of meta-analyses of parameters from village-level logistic regression models  
 213 explaining the use of each preventive measure. Variables were chosen for each measure by  
 214 backward model selection as described in the Methods section; variables are grouped as **A:**  
 215 intercept; **B:** Individual characteristics; **C:** Opinion leaders; **D:** Network size; **E:** Network  
 216 exposure; **F:** Household exposure;  $\mu$  – estimated population parameters (log odds ratios); SE  
 217 – standard errors of estimates; p values: \* <0.05, \*\* <0.01, \*\*\* <0.001.

218 **Table 1** shows that at least two explanatory factors were retained in the model selection  
 219 process for every preventive measure. The meta-analysis of parameters highlights that there  
 220 were two of these that were consistently associated with measure use across the villages.

221 First, network exposure significantly increased the probability of using five of the eight  
222 measures, except for gloves, insecticide cream, and vaporizers (odds ratios ranging from 2.8  
223 to 9.1). Household exposure was significantly positively associated with the use of measures  
224 in seven cases, with the only exception LLINs (odds ratios for significant estimates between  
225 2.7 and 10.8). These effect sizes are quite substantial, considering that the average number  
226 of discussion partners and the average household size are both 2 in the entire dataset. For  
227 example, our models predict that one additional discussion partner using boots would double  
228 the odds of a villager with an average-sized network using boots (network exposure log odds  
229 ratio 1.39).

230 Other explanatory variables did not have a consistent impact across preventive measures. Of  
231 the considered individual characteristics, only gender (boots), working in fields (coils), and  
232 education (insecticide cream) had a significant effect on measure use and only for one  
233 measure. The number of reported discussion partners outside of one's village only had a  
234 significant positive effect on the use of covering clothes. Talking to village opinion leaders,  
235 ASHAs and Traditional Healers, did not have a significant impact on the use of any of the  
236 measures. These results do not indicate that individual variables, opinion leaders, and  
237 network size are not associated with the use of measure at all. However, the effects of these  
238 factors vary from village to village (see the Supplementary Information, Appendix D, Tables  
239 D10-D17 for village-level model results).

#### 240 **Relevance of network and household exposure for explaining the use of measures**

241 Next, we examine the accuracy of village-level models to assess the importance of different  
242 factors in explaining the use of preventive measures. To do so, we fit seven nested models  
243 for each preventive measure in each village, which include different subsets of the  
244 explanatory variables, as marked by the letters A-F in **Table 1**. The Empty Model contains an  
245 intercept term only (subset A) and serves as a baseline for accuracy per measure and village.  
246 The Individual Model includes the individual variables that were used for the given measure  
247 as well (A+B). The Opinion Leader Model further includes any effects of talking to the ASHA  
248 or the Traditional Healer (A+B+C). The Network Size Model considers any included variables  
249 related to the number of discussion ties (A+B+C+D). The Network Exposure Model  
250 (A+B+C+D+E) and the Household Exposure Model (A+B+C+D+F) add the relevant exposure  
251 term to the Network Size Model. The Full Model for each preventive measure is the same as  
252 the one reported in **Table 1**.

253 We compare the accuracy (correct classification rate) of the above models. The results are  
254 presented in **Figure 4**. The average accuracy of the Empty Model is 77%. Adding individual  
255 (77%), opinion leader (78%), and network size variables (79%) makes only a small difference.  
256 In contrast, including either network exposure or household exposure improves average  
257 accuracy by 2% and 3% compared to the Network Size Model. The Full Model, which includes  
258 both exposure terms beyond the Network Size Model, has an average accuracy of 83%. (For  
259 village- and measure-level classification rates, see the Supplementary Information, Appendix  
260 D, Tables D29-38).



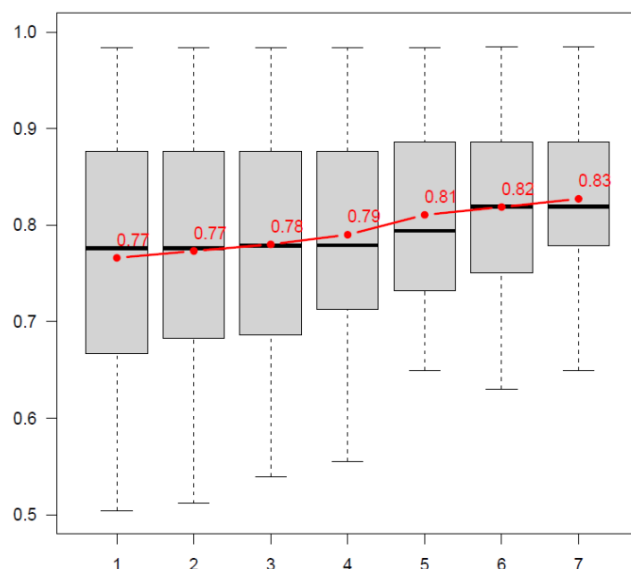

261

262 **Figure 4:** Distribution of the accuracy of different village-level logistic model specifications.  
263 Each bar represents models using different variable subsets of the models in **Table 1**,  
264 denoted by A-F; accordingly, each bar represents the accuracy of 61 models; the connected  
265 red points and values show the average accuracy of models; stars represent p-values for two-  
266 sided pairwise sample t-tests of the difference in the average accuracy of models adjacent in  
267 the figure: \* $p < 0.05$ , \*\* $p < 0.01$ , \*\*\* $p < 0.001$  (for full t-test statistics, see the Supplementary  
268 Information, Tables D27-D20).

269 Overall, the 6 percentage point improvement in accuracy between the Empty Model and the  
270 Full Model, and the 4 percentage point increase from including network and household  
271 exposure alone, may not appear high. However, these numbers should be interpreted in the  
272 context of a high baseline accuracy due to the skewness of measure use in many cases (e.g.,  
273 LLINS are adopted by nearly everyone). Considering this, it is noteworthy that network and  
274 household exposure reduce the classification error of the Network Size Model by 20%, from  
275 0.21 to 0.17. These results suggest that the two exposure factors substantially contribute to  
276 explaining the use of preventive measures.

### 277 **Social mechanisms associated with preventive measure use**

278 The results presented so far indicate that network and household exposure are key factors  
279 explaining the use of preventive measures in our villages. To explore the specific social  
280 mechanisms which may explain measure use, we fitted stationary SAOMs to the multilevel  
281 network of use and discussion ties, as defined earlier, in each village. We summarise the  
282 results of ten similarly specified SAOMs (one per village) by a meta-analysis of parameters in  
283 **Table 2**. As we are interested in the use of preventive measures, here we only discuss model  
284 effects that explain which measures are used by individuals. The models also simultaneously  
285 treat the village discussion network as an outcome that co-evolves with measure use (see the  
286 **Methods** section for further details on the model). This allows us to disentangle effect

287 directions between discussion and use, and thus take a step closer to identifying likely causal  
 288 impacts of social networks on the use of measures. The full results of the SAOM meta-  
 289 analysis, all village-level model estimates, convergence statistics, and goodness-of-fit  
 290 statistics are reported in the Supplementary Information, Appendix E, Tables E1-E6.

| <b>A</b>                                                                            | <b>Effects of structure of measure use</b>    | $\mu$ | SE   | p     |     |
|-------------------------------------------------------------------------------------|-----------------------------------------------|-------|------|-------|-----|
| 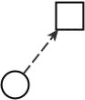   | (1) Outdegree (intercept)                     | -2.22 | 0.56 | 0.000 | *** |
|    | (2) Agreement with villagers (4-cycles) x 100 | 0.02  | 0.20 | 0.919 |     |
|    | (3) Popularity of measure                     | 0.02  | 0.00 | 0.000 | *** |
|   | (4) Activity of villager                      | -0.11 | 0.06 | 0.086 |     |
| <hr/>                                                                               |                                               |       |      |       |     |
| <b>B</b>                                                                            | <b>Effects of individual variables</b>        |       |      |       |     |
|  | (5) Female                                    | -0.09 | 0.09 | 0.315 |     |
|  | (6) Head of household                         | -0.09 | 0.09 | 0.368 |     |
|  | (7) Carer for a sick person                   | -0.06 | 0.11 | 0.597 |     |
|  | (8) Work in fields                            | 0.11  | 0.08 | 0.170 |     |
|  | (9) Age                                       | 0.06  | 0.06 | 0.343 |     |
|  | (10) Education                                | 0.07  | 0.04 | 0.110 |     |
| <hr/>                                                                               |                                               |       |      |       |     |
| <b>C</b>                                                                            | <b>Effects of opinion leaders</b>             |       |      |       |     |
|  | (11) Talking to the ASHA                      | 0.26  | 0.12 | 0.030 | *   |
|  | (12) ASHA's use of a specific measure         | 0.23  | 0.16 | 0.158 |     |

|                                                                                     |                                                     |       |      |       |     |
|-------------------------------------------------------------------------------------|-----------------------------------------------------|-------|------|-------|-----|
| 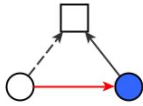   | (13) ASHA's use of a measure if talking to ASHA     | 0.06  | 0.17 | 0.716 |     |
|    | (14) Talking to Healer                              | 0.10  | 0.20 | 0.628 |     |
|    | (15) Healer's use of a specific measures            | -0.09 | 0.11 | 0.436 |     |
|    | (16) Healer's use of a measure if talking to Healer | -0.01 | 0.33 | 0.995 |     |
| <b>D</b> <i>Effects of network size (talking to others)</i>                         |                                                     |       |      |       |     |
|    | (17) Number of other villagers one talks to         | -0.33 | 0.11 | 0.003 | **  |
|    | (18) Number of other villagers who talk to one      | 0.01  | 0.04 | 0.728 |     |
|   | (19) Number of non-villagers one talks to           | 0.10  | 0.03 | 0.000 | *** |
| <b>E</b> <i>Effect of network exposure</i>                                          |                                                     |       |      |       |     |
|  | (20) Using same measures as that one talks to       | 0.82  | 0.18 | 0.000 | *** |
| <b>F</b> <i>Effect of household exposure</i>                                        |                                                     |       |      |       |     |
|  | (21) Using same measures as household members       | 0.07  | 0.03 | 0.048 | *   |

291 **Table 2:** Meta-analysis of estimates from multilevel stationary SAOMs in each village. Circles  
 292 represent villagers; in each effect (explanatory variable), blue circles indicate villagers with  
 293 specific characteristics (e.g., gender), squares represent preventive measures, red arrows  
 294 represent health-related discussion ties, black solid arrows represent preventive measure  
 295 use, and black dashed arrows represent the dependent tie, the probability of which is  
 296 assessed by the given effect; rate parameters were fixed at 2.5 for both networks in all  
 297 models; all models converged according to the criteria set out in Ripley et al. (2022) – see the  
 298 Supplementary Information, Appendix E, Tables E5-E6 for further details;  $\mu$  – estimated  
 299 population parameters (log odds ratios); SE – standard errors of estimates; p values: \* <0.05,  
 300 \*\* <0.01, \*\*\* <0.001.

301 Like in any SAOM, the first set of parameters (A) control for the overall structure of the use  
 302 network. The outdegree (density) effect (effect (1) in **Table 2**), which is significantly negative,  
 303 is the intercept and highlights that using a measure is not very common on average: the

304 estimated baseline probability is 11%. The 4-cycle effect (2) expresses tendencies for  
305 similarity of use between individuals, which is not significant. The positive popularity of  
306 measures effect (3) reflects that villagers are significantly more likely to use measures which  
307 are already used by several others. The non-significant villager activity effect (4) suggests that  
308 there are no differences in villagers' tendency to use a measure based on how many other  
309 measures they are currently using.

310 The second set of parameters (B) models individual characteristics (5-10). None of these  
311 variables explain the use of preventive measures significantly, in line with the results of the  
312 logistic models. The third set of parameters (C) looks at the role of opinion leaders (11-16).  
313 Here, contrary to what we found for individual measures, talking to the ASHA significantly  
314 increases the odds of using any preventive measure, by 30% on average (11). However,  
315 talking to the Traditional Healer and considering the specific measures that the ASHA and the  
316 Traditional Healer uses do not seem to matter consistently across the villages. The fourth set  
317 of parameters (D) looks at effects of discussion network size (17-19). We find that talking to  
318 more people in one's own village significantly reduces (17), while talking to more people  
319 outside of the village increases the odds of using any preventive measure (19) (odds ratios  
320 0.72 and 1.10). Finally, being talked to by many within one's village does not significantly  
321 influence the likelihood of using measures (18).

322 The last two sets of parameters (E-F) model network and household exposure (20-21). Both  
323 parameters are significant and positive. Network exposure (20) more than doubles the odds  
324 of use of a measure for each additional discussion partner who reports using the same  
325 measure (odds ratio 2.27). Further, if two members of a household use the same measure  
326 (21), it is more likely on average that they both use other measures as well (odds ratio 1.07).  
327 While both effects appear substantial in size, their relative importance may vary by individual,  
328 depending on the size of their discussion networks and households.

### 329 **Network and household exposure explain patterns of preventive measure use and health-** 330 **related discussions**

331 The above results highlight the importance of considering villagers' discussion networks  
332 when we explain the use of preventive measures. To assess how well our village-level SAOMs  
333 capture the connections between the discussion and use networks, we compare the  
334 goodness of fit of different model specifications that include subsets of the effects in the full  
335 model in Table 2. **Figure 5** shows the distribution of SAOM goodness of fit p-values with  
336 regard to the mixed triad census of the two modelled networks (Hollway et al., 2017). We  
337 find that fit of a Baseline Model considering only endogenous structural effects in the  
338 discussion and use networks (effect group A) generally achieves a poor fit on these statistics.  
339 Sequentially adding effects of individual characteristics (A+B), opinion leaders (A+B+C), and  
340 network size (A+B+C+D) does not improve the fit. Adding network exposure (A+B+C+D+E) or  
341 household exposure (A+B+C+D+F) leads to a large improvement in model fit, while there are  
342 further gains from including both types of exposure effects (Full Model). We note that  
343 excluding network exposure from the Full Model has a statistically significant negative impact  
344 on fit (paired sample one-sided t-test: difference=-0.12, t=2.22, p=0.03, df=9), while  
345 excluding household exposure does not (difference=-0.08, t=1.63, p=0.07, df=9). These

346 results provide a clear indication that effects from network exposure and household  
347 exposure are crucial in explaining the links between the use preventive measures and  
348 discussion networks. Village-level goodness of fit statistics are reported in the Supplementary  
349 Information, Appendix E, Tables E5-E6.

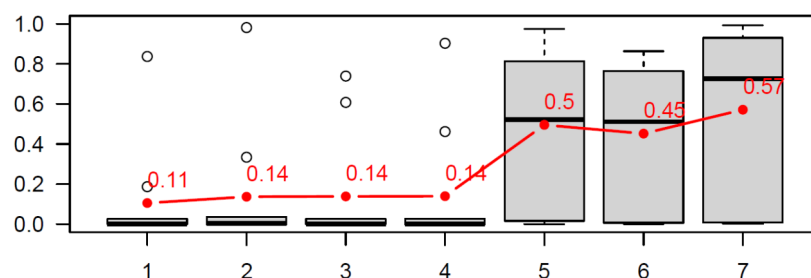

350  
351 **Figure 5.** Comparison of village-level SAOM specifications by goodness fit (GoF) p-values  
352 regarding the combination of talk network and measure use ties. Each bar represents models  
353 using different variable subsets from **Table 2**, denoted by A-F; accordingly, each bar  
354 represents GoF results of 10 models; the considered GoF statistic is the mixed triad census of  
355 Hollway et al. (2017); the connected red points and values show the average GoF p-values of  
356 the models; stars represent p-values for one-sided pairwise sample t-tests of the difference  
357 in the average GoF p-value of models adjacent in the figure: \* $p < 0.05$ , \*\* $p < 0.01$ , \*\*\* $p < 0.001$ .

## 358 DISCUSSION

359 Our results demonstrate that considering social networks contributes to the explanation of  
360 health-related behaviours and practices. We examined a variety of factors that may influence  
361 the uptake of eight malaria-preventive measures in ten hard-to-reach tribal communities in  
362 northeast India, using standard statistical methods and social network models. We found that  
363 exposure to the use of preventive measure in one's social network was consistently  
364 associated with own use. In both standard and network models explaining measure use, we  
365 showed that network exposure significantly improves the explanatory power of the models.  
366 Exposure in households had a comparable role in our analyses, while factors typically  
367 considered in studies of health behaviour, such as individual characteristics [Nlinwe et al.,  
368 2021; Matin et al., 2020; Van Eijk et al., 2016; Shahandeh et al, 2012] and opinion leaders  
369 [Stoebenau and Valente 2003; Valente and Pumpang 2007], had little to no effect.

370 The findings about social network effects are theoretically relevant as they provide empirical  
371 support for core ideas of network exposure models [Coleman et al., 1957; Valente, 1996;  
372 Valente 2010; Centola, 2018]. According to these, information and attitudes regarding both  
373 effective and ineffective preventive behaviours should be less dependent on who people are  
374 and more on whom they talk to. This suggests that research on health behaviours and social  
375 influence could benefit from further theoretical work that explores specific social  
376 mechanisms of network exposure. The effect of household members' behaviour is also

377 important, especially because exposure in households does not necessarily have to rely on  
378 discussions. People may use preventive measures simply because they are available in the  
379 house where they live, where exposure can be tacit and reinforced by observing use rather  
380 than talking about it. Collecting data on social networks and household composition,  
381 information on which are both not immediately available in contexts where census data are  
382 lacking, requires considerable amount of time and resources, but our analyses clearly show  
383 that these can provide novel theoretical and empirical insight into social processes explaining  
384 health behaviours.

385 We found a positive effect of discussion ties extending outside villages on the likelihood of  
386 using malaria preventive measures. We know from our data that these ties are mainly  
387 constituted by family and in-law ties (Of the 841 ties to people from other villages, 74% are to  
388 family members, 11% to relatives, and 15% to non-blood contacts). In Meghalaya, a  
389 matrilineal society, upon marriage sons move out of their maternal homes to stay at their  
390 spouse's home, while daughters remain close to their families of origin. The move of sons  
391 across villages creates networks of partially weak ties [Granovetter 1978]: these relationships  
392 are weak, according to Granovetter's definition [1978] in the sense that they are  
393 geographically distant and in infrequent contact. They are also potential sources of new  
394 information and attitudes about preventive techniques as they reach outside one's own,  
395 closely-knit village community. At the same time, family and relatives in different villages are  
396 emotionally close enough – a characteristic normally associated with strong ties [Granovetter  
397 1978] to rely on each other for health-related discussions, which increases the chance that  
398 they actually influence villagers' health-related attitudes and behaviours. Therefore,  
399 intervillage ties complement the effects of network and household exposure on the use of  
400 preventive measures. The relatively small effect and explanatory importance of these ties  
401 may be due to the fact that they are informationally redundant: family and relatives likely all  
402 talk to each other, so they may end up sharing similar information or opinions. These findings  
403 point to the relevance of studying the extended family as a key social unit in shaping health-  
404 related behaviours and practices.

405 Interestingly, our analysis shows almost no effects from opinion leaders on using preventive  
406 measures. The literature suggests that they are rarely early adopters, but they could be  
407 instrumental in facilitating or hampering the spread of innovations [Valente and Pumpang  
408 2007]. Our data does not allow to observe when exactly the ASHA and the Traditional Healer  
409 started using specific preventive measures, but results clearly indicate that their behaviour  
410 does not influence other villagers regardless if they talk to them or not. Talking to the ASHA  
411 does have an effect on using more measures, but this is small and it does not substantially  
412 contribute to model fit. This result may inform the planning of future interventions, as it  
413 indicates that relying solely on central actors like the ASHA may not be effective in improving  
414 disease prevention.

415 Similarly, we find little evidence that any of the individual characteristics we considered  
416 would consistently matter for use across villages and preventive measures. We did see  
417 indications in the logistic models that gender, type of work, and education are associated  
418 with measure use in case of a single measure. Other characteristics also appear to be



419 relevant, but only in some villages and in case of a few preventive measures (see the  
420 Supplementary Information, Appendix D, Tables D10-D17). Overall, our analyses do not  
421 suggest that individual factors do not matter at all, only that their effects on the use of  
422 measures may differ from community to community. By exploring these differences in a  
423 localised geographic context, large-scale public health interventions can be effectively  
424 tailored to the attitudes and practices of relevant social groups.

425 Our study has a few key limitations that may inform the design of future research into health-  
426 related behaviours. First, we collected self-reported data on behaviours and social ties. Self-  
427 reports are known to be sensitive to recall bias [Bernard and Killworth 1977; Small 2017] as  
428 well as socially desirable responses [Edwards 1953]. We aimed to attenuate this issue by  
429 keeping questions about prevention practices and discussion ties general. We only asked  
430 participants to report on whether they use different preventive measures or not (we queried  
431 frequency of use regarding covering clothes and insecticide cream but disregarded this detail  
432 in the analyses for comparability; see the Supplementary Information, Appendix B1 for  
433 details). We measured social networks by asking people whom they talk to about health-  
434 related matters without reference to details of these exchanges. While these questions could  
435 reduce recall problems, they did not inform us about the frequency and contexts of measure  
436 use and the content of discussions. Employing field observations [Bernard and Killworth  
437 1977; Curtis et al., 1995] and smart sensor technologies [Cattuto et al., 2010; Elmer et al.,  
438 2019; Voros et al. 2021] may help to gather richer data. However, trade-offs between data  
439 quality and resolutions should be carefully considered, as these methods are more intrusive  
440 and may lead to lower participation rates [Voros et al. 2021] and alter behaviour  
441 [Landsberger, 1958]. Our interview-based approach helped us to gain the trust of our  
442 participants and elicit meaningful responses about general patterns of measure use and  
443 discussion ties.

444 Second, the validity of our findings should be assessed in the context of coverage and sample  
445 size. Our overall response rate is 68%, which is considered sufficiently high for statistical  
446 network analyses [Kossinets 2006]. However, coverage was not equal across the three  
447 regions and was only just over 60% in West Jaintia Hills. This partially compensated with the  
448 higher coverage of households (80%). Overall, our data collection efforts have resulted in  
449 reasonably high response rates that indicate the adequate internal validity of our results. In  
450 turn, our findings should not be generalised beyond the studied contexts. We only had the  
451 resources to observe a small proportion of communities in just three districts of Meghalaya  
452 state. Nonetheless, we found some common patterns in the studied communities which  
453 suggest that processes from network and household exposure may help to explain the use of  
454 preventive measures. We need larger-scale, regionally representative datasets to confirm  
455 these findings and gain a more complete picture of the social mechanisms driving health-  
456 related behaviours. Our results further suggest that future work should focus on collecting  
457 detailed data on weak ties and inter-villages relationships. Combined with a large-scale  
458 approach, this could improve our understanding of how effectively preventive measure  
459 spread across malaria endemic regions.

460 Third, we interpret our key results in terms of social processes, while we collected and

461 analysed cross-sectional data. Clearly, analysing one snapshot of networks and behaviours  
462 comes with limitations. We do not know how the use of measures changed over time. It is  
463 also possible that some measures were becoming popular, while others unpopular at the  
464 time of the data collection. We do not have information about the stability of health-related  
465 discussion ties either, although the network literature suggests that such relations should be  
466 stable in the short-term [Hogan et al., 2022]. In line with these concerns, our logistic  
467 regression results only highlight associations, without considering the effects of measure use  
468 on social networks. The Stochastic Actor-oriented Model is better suited to identify the social  
469 processes at play. Even when applied to cross-sectional data, the SAOM is dynamic: it  
470 assumes that villagers may still change their behaviour and network ties, but these changes  
471 keep the overall structure of the multilevel network in a stable state (in a “short-term  
472 dynamic equilibrium”; Snijders and Steglich 2015). This means that the model considers both  
473 the effects of network ties on measure use and vice versa (see full results the Supplementary  
474 Information, Appendix E, Tables E1-E2). By concurrently modelling the dependencies  
475 between network ties and behaviours, we may infer to the social mechanisms that are likely  
476 to maintain the network system [Lusher et al. 2012], such as network or household exposure.  
477 Any causal claims that are made on the basis of “multi-mechanistic” network models  
478 [Stadtfeld and Amati 2021], such as the SAOM, are stronger than those based on results from  
479 non-network models. At the same time, collecting longitudinal data and studying the actual  
480 changes of networks and behaviour will be required to gain a clear understanding of the  
481 dynamics of measure use. Our approach can be easily adapted to serve as a basis of such a  
482 longitudinal design.

483 For the first time since 2015, when malaria elimination efforts were initiated in India [PIB  
484 2020], local elimination may be within reach. However, current control efforts rely solely on  
485 mass interventions. These include the large-scale distribution of LLINS that was interrupted in  
486 India in recent years [WHO 2022], and IRS which is met with high levels of refusal in  
487 Meghalaya [Sarkar et al., 2021; Passah et al., 2022]. Our study suggests that these  
488 interventions could be complemented with targeted efforts that leverage social influence in  
489 interpersonal relations and households to increase uptake. This could help to achieve  
490 downstream elimination goals. However, further research is needed to map the patterns of  
491 measure use across different areas and social groups and to understand the social  
492 mechanisms that may facilitate or hamper the adoption of various health behaviours. This  
493 line of work may contribute to increasing the acceptance of a malaria vaccine in the future.  
494 Beyond the context of malaria, exploring the role of social networks in health behaviour  
495 could benefit the prevention of other serious mosquito-borne diseases, such as Dengue,  
496 Chikungunya and the newly emerging Zika virus [Gulland 2016], which are on the rise both  
497 globally and in India [Shepard et al. 2014].

## 498 **METHODS**

### 499 **Data collection**

500 From January 2020 through August 2021, we collected data from three villages in West Khasi  
501 Hills (WK1, WK2, WK3), three in West Jaintia Hills (WJ1, WJ2, WJ3) and four in South Garo  
502 Hills (SG1, SG2, SG3, SG4) in Meghalaya, India. Villages were selected based on their

503 manageable size (<500 eligible adults), their known willingness to participate in similar  
504 studies (we avoided villages where previous epidemiological studies encountered high rates  
505 of refusal, see Kessler et al., 2018), and their accessibility by either car or foot. Village-level  
506 coverage ranged from 53% of residents in WJ3 (80% of households) to 88% in WK3 (97% of  
507 households), with an average of 68% of individuals (n=1,530) and 80% households (a total of  
508 766) interviewed. The topic of coverage is addressed in the Discussion section. Characteristics  
509 of non-respondents are reported in the Supplementary Information, Appendix A, Table A2.

510 Structured interviews were conducted in the appropriate local language (Khasi, Pnar or Garo)  
511 and translated into English by the interviewing team. Respondents were asked a series of  
512 questions regarding their individual background, household and village roles, their use of  
513 malaria preventive measures, and the people in and outside of their village they talk to about  
514 health-related issues. In total, each interview consisted of 26 questions and lasted about 30  
515 minutes. The full list of interview questions, details about data coding and processing, and  
516 descriptive statistics for variables are reported in the Supplementary Information, Appendix  
517 B, Tables B1-B15.

518 The ASHA was interviewed in all ten villages, and in the six villages where present, the  
519 Traditional Healer was also interviewed. As we consider the ASHA and the Traditional Healers  
520 as opinion leaders, whose behaviour and influence may be substantially different from those  
521 of other villagers, we removed these two actors as respondents from our analyses. We still  
522 utilize information about their use of measures and about who talks to them to explain the  
523 behaviour and social networks of other villagers.

524 Permission to conduct the study was granted by the Headman of each village, and all  
525 respondents also signed an individual informed consent form. Identifiers of the villages and  
526 individual participants were removed from the dataset and this article to protect anonymity.  
527 Ethical approval for the study was obtained from the Institutional Review Boards (IRBs) of  
528 Martin Luther Christian University, Shillong, Meghalaya, India and New York University, New  
529 York, NY, USA.

## 530 **Variables**

531 The dependent variables in our analyses represent the use of eight malaria prevention  
532 measures by participants: Long-Lasting Insecticidal Nets (LLINs), covering clothes, boots,  
533 gloves, insecticide cream, coils, vaporisers, and burning materials. We considered how a  
534 variate of explanatory variables were associated with these outcomes in different  
535 multivariate statistical models. In total, 14 relevant explanatory variables were available in  
536 the dataset and were considered in our analyses. We reduced this set for the meta-analysis  
537 of logistic regressions by a model selection procedure described below. The fitted social  
538 network models estimated a larger number of parameters, because each variable can affect  
539 the outcome in multiple ways in these models.

540 The starting set of explanatory variables was the following:

- 541 - **Individual characteristics and roles in the household:** (1) gender, (2) being the head of  
542 the household, (3) looking after family members when they are sick (4) working in

- 543 fields, (5) age, and (6) educational background.
- 544 - **Contact with opinion leaders:** the participant or someone from their household talks
- 545 to the Asha (7-8) or the Traditional Healer (9-10) of the village about health-related
- 546 issues.
- 547 - **Social network size:** the number of people in and outside the village the participant
- 548 talks to about health-related issues (11-12).
- 549 - **Social network exposure:** the amount of people the participant talks to who use a
- 550 given preventive measure (13)
- 551 - **Household exposure:** the amount of people in the participant's household who use a
- 552 given preventive measure (14)

### 553 **Logistic regression model selection procedure**

554 We considered 14 explanatory variables for each logistic model explaining the use of a given

555 preventive measure in a specific village (see the Supplementary Information, Appendix B, for

556 the complete list of variables). Given the size of our villages and the often skewed distribution

557 of measure use, we found that in most cases models including all 14 explanatory factors

558 could not be estimated. Therefore, we employed a two-stage model selection procedure

559 aimed at reducing the set of explanatory variables while providing a single specification per

560 measure that can be estimated in every village. First, we carried out backward model

561 selection based on the p-values of parameter estimates for each of the 8 (measures) x 10

562 (villages) = 80 models. This resulted in different optimal model specifications across measures

563 and villages. Second, considering each measure separately, we added variables back that had

564 a significant estimate in at least two of the villages. This resulted in 8 different model

565 specifications, one for each preventive measure, that were identical across the villages. The

566 exact steps of our procedure are detailed in Procedure 1. Estimating the reduced models was

567 still difficult in case of some villages and preventive measures. We omitted models from the

568 meta-analyses reported in the text that had very large estimated parameters and/or standard

569 errors for at least one explanatory variable. The presented results are based on 61 models.

570 See the Supplementary Information, Appendix D, Table D18 for the excluded models.

---

#### **Procedure 1. Two-stage model selection approach**

---

Denote villages as  $v_i \in V$  where  $i \in \{1, \dots, 10\}$ , preventive measures as  $m_j \in M$  where  $j \in \{1, \dots, 8\}$ , and explanatory variables as  $e_k \in E$  where  $k \in \{1, \dots, 18\}$ .

##### Stage I. Backward model selection

Repeat for every combination of  $i$  and  $j$ :

Estimate a logistic model in  $v_i$  with  $m_j$  as dependent and  $E$  as explanatory variables

Define  $E' = E$

Repeat until  $p < 0.05$  for all estimates for variables in  $E'$ :

Identify the explanatory variable  $e^*$  with the highest p-value of the estimate

**$E' = E' \setminus e^*$  (exclude  $e^*$  from  $E'$ )**

Estimate a new logistic model with  $E'$  as the explanatory variable set

Define  $E_{ij} = E'$

Return  $E_{ij}$

---

---

Stage II. Find identical specifications for each measure across villages

Repeat for every j:

Define  $d = 1$

Repeat until all parameters and standard errors can be estimated in all models:

Define  $E^*$  as set containing all elements that occur in  $E_{1j}, \dots, E_{10j}$  at least  $d$  times (for  $d=1$ , this is the union of the ten sets)

Estimate logistic models in every  $v_i$  with  $m_j$  as dependent and  $E^*$  as explanatory variables

If not all models can be estimated then  $d = d+1$

Define  $E_j^* = E^*$

Return  $E_j^*$

---

571

## 572 **Meta-analyses of village-level logistic regressions**

573 To explore recurrent patterns of association between the use of different measures and our  
574 explanatory variables across villages, we meta-analysed the model results obtained from the  
575 model selection procedure described above. We perform parameter-wise meta-analyses with  
576 random-effects models estimated by restricted maximum likelihood using the metafor  
577 package (v3.8-1) in R (Viechtbauer 2010). Estimates provide information about the mean and  
578 standard error of parameters. Heterogeneity statistics are reported in the Supplementary  
579 Information, Appendix D, Tables D19-D26. The meta-analysis results are presented in Table 1.

## 580 **Comparison of the explanatory power of nested logistic regression models**

581 We compared the explanatory power of the village-level logistic models described above and  
582 of nested models that contain different subsets of the explanatory variables. We calculated  
583 the accuracy for each model as the correct classification rate: the percentage of cases for  
584 which the observed value of the dependent variable (whether a villager uses a given measure  
585 or not) equals the estimated value obtained from the model. We used the standard 0.5 cut-  
586 off for transforming probabilities into estimated binary outcomes. The results of this analysis  
587 are presented in Figure 4, while the accuracy of the village-level models for each village are  
588 reported in Supplementary Information, Appendix D, Tables D29-D38.

## 589 **Meta-analysis of village-level stationary Stochastic Actor-oriented Models**

590 For a more detailed analysis of the social mechanisms affecting the use of preventive  
591 measures, we employed stationary Stochastic Actor-oriented Models (SAOMs). Stationary  
592 SAOMs are an extension of the original model [Snijders et al. 2010; Snijders 1996] for the  
593 analysis of cross-sectional network data. In this case, it is assumed that the networks studied  
594 are in a short-term dynamic equilibrium: their structure (but not single network ties) is at  
595 least temporarily in a stable state [Snijders and Steglich 2015]. SAOMs are empirically  
596 calibrated simulation models that aim at identifying the relative strength of a set of social  
597 mechanisms, operating on network ties, individual and pairwise (dyadic) covariates, that over  
598 time could have generated an observed network. In a standard longitudinal SAOM, the model  
599 is conditional on the first observation of the network [Snijders et al. 2010]. In a stationary  
600 SAOM, the initial and final states of the network are identical, and the modelled social

601 processes will, at least stochastically, maintain the existing structure of the network (hence  
602 the 'stationary' label) [Snijders and Steglich 2015].

603 To apply stationary SAOMs, we defined a multilevel network that consists of two interlinked  
604 networks in each village: 1) the network of health-related discussions, which is a one-mode  
605 network where villagers A and B are connected by a binary tie if A reports talking to B; and 2)  
606 the network of preventive measure use, which is a two-mode network where villager A is  
607 connected to measure M if A reports using M. An example of this network for one of the  
608 villages is presented in Figure 3. Similar visualisations for all villages can be found in the  
609 Supplementary Information, Appendix C.

610 We fit stationary SAOMs using the RSiena (v1.3.0) package in R (Ripley et al. 2022). We set  
611 the rate parameter to 2.5 for both networks in all villages, as this value enabled model  
612 convergence and led to good model fit in every case. The key results are interpreted in the  
613 main text. The full list of estimates, goodness of fit tests and robustness checks for rate  
614 parameters are presented in the Supplementary Information, Appendix E. Similar to the case  
615 of logistic regressions above, we perform parameter-wise meta-analyses of village-level  
616 SAOMs with random-effects models estimated by restricted maximum likelihood using the  
617 metafor package (v3.8-1) in R (Viechtbauer 2010). Estimates provide information about the  
618 mean and standard error of parameters. Heterogeneity statistics are reported in the  
619 Supplementary Information, Appendix E, Table E4. The meta-analysis results are presented in  
620 Table 2.

### 621 **Comparison of the explanatory power of nested SAOMs**

622 We compared the explanatory power of the village-level SAOMs described above and of  
623 nested models that contain different subsets of the model effects. We calculated p-values of  
624 Mahalanobis distances for a mixed triad census fit test for different SAOM specifications in  
625 the results section. These reflect how well the distribution of simulated networks based on  
626 the fitted models represent the mixed triad census [Hollway et al., 2017] of the observed  
627 networks: a p-value close to 1 signifies very good fit and one close or equal to 0 marks poor  
628 fit [Ripley et al., 2022]. Calculations in each model are based on 5000 simulations and follow  
629 the steps described in Lospinoso and Snijders [2019]. The goodness of fit tests were carried  
630 out using the RSiena R package [Ripley et al., 2022]. The results are presented in Figure 5.  
631 Further details of the goodness of fit analyses can be found in the Supplementary  
632 Information, Appendix E, Table E5.

### 633 **ACKNOWLEDGMENTS**

634 We thank the study participants for their time, our field teams for their data collection and  
635 transcribing efforts, and the Meghalaya Malaria State Control Programme for their support  
636 and ongoing collaboration. We also thank Drs. Mark Wilson and Steven Sullivan for  
637 manuscript editing and input. Research reported in this publication was supported by the  
638 National Institute of Allergy and Infectious Diseases of the National Institutes of Health under  
639 Award Number U19AI089676. The content is solely the responsibility of the authors and does  
640 not necessarily represent the official views of the National Institutes of Health.



641 **AUTHOR CONTRIBUTIONS**

642 E.B., A.K., A.v.E., J.C., and S.A. designed the study and analyses. M.P. C.B.N, Q.D.N and C.K.  
643 conducted the questionnaires and collected the data, under the supervision of R.S. and S.A.  
644 E.B. and A.V. analysed the data and wrote the first draft of the paper. All authors finalized the  
645 manuscript. J.C. obtained the funding.

646 **COMPETING INTERESTS**

647 The authors declare no competing interests.

648 **ADDITIONAL INFORMATION**

649 **Supplementary information**

650 **Correspondence and requests for materials** should be addressed to Elisa Bellotti and Sandra  
651 Albert.

652 **Data availability.** TBA

653 **Code availability.** TBA

654 **REFERENCES**

655 adams, j., & Schaefer, D. R. (2016). How initial prevalence moderates network-based smoking  
656 change: estimating contextual effects with stochastic actor-based models. *Journal of Health*  
657 *and Social Behavior*, 57(1), 22-38.

658 Albert, S., Nongrum, M., Webb, E.L., Porter, J.D., Kharkongor, G.C. Medical pluralism among  
659 indigenous peoples in northeast India—implications for health policy. *Trop Med Int Health*.  
660 20:952–60 (2015).

661 Bartels, C. and Ketellapper, R. (eds) (1979) *Exploratory and Explanatory Statistical Analysis of*  
662 *Spatial Data*, The Hague: Martinus Nijhoff.

663 Bedson, J., Skrip, L.A., Pedi, D. *et al.* A review and agenda for integrated disease models  
664 including social and behavioural factors. *Nat Hum Behav* 5, 834–846 (2021).

665 <https://doi.org/10.1038/s41562-021-01136-2>

666 Burt, Ronald S. 2004. "Structural Holes and Good Ideas." *American Journal of Sociology*,  
667 110(2): 349–99.

668 Cattuto C, Van den Broeck W, Barrat A, Colizza V, Pinton J-F, Vespignani A (2010) Dynamics of  
669 Person-to-Person Interactions from Distributed RFID Sensor Networks. *PLoS ONE* 5(7):  
670 e11596. <https://doi.org/10.1371/journal.pone.0011596>

671 Centola, D. & Macy, M. W. Complex contagions and the weakness of long ties. *Am. J. Sociol.*  
672 113, 702–734 (2007).

673 Centola, D. An Experimental Study of Homophily in the Adoption of Health Behavior. *SCIENCE*  
674 334, 6060: 1269-1272 (2011). DOI: 10.1126/science.1207055

675 Centola, D. *How Behavior Spreads: The Science of Complex Contagions* (Princeton University

- 676 Press, 2018
- 677 Centola, D. The spread of behavior in an online social network experiment. *Science* 329,  
678 1194–1197 (2010).
- 679 Christakis, N.A., and Fowler, J.H. The spread of obesity in a large social network over 32 years.  
680 *The New England journal of medicine* 357,4: 370-9 (2007). doi:10.1056/NEJMsa066082
- 681 Coleman J., Katz E., Menzel H., 1957, The Diffusion of an Innovation Among Physicians,  
682 *Sociometry*, 20, 4: 253-270.
- 683 Crosnoe, R., Frank, K., Mueller, A.S. Gender, body size and social relations in American high  
684 schools. *Soc Forces* 86 (3):1189–1216 (2008).
- 685 Curtis, R., et al. (1995). Street-level drug markets: network structure and HIV risk. *Social*  
686 *Networks* 17: 229-49.
- 687 Debboun, M., Strickman, D. Insect repellents and associated personal protection for a  
688 reduction in human disease. *Med Vet Entomol.* 27(1):1-9 (2013). doi: 10.1111/j.1365-  
689 2915.2012.01020.x.
- 690 Dhiman, S. Are malaria elimination efforts on right track? An analysis of gains achieved and  
691 challenges ahead. *Infect Dis Poverty* 13, 8(1):14 (2019). [https://doi.org/10.1186/s40249-019-](https://doi.org/10.1186/s40249-019-0524-x)  
692 [0524-x](https://doi.org/10.1186/s40249-019-0524-x)
- 693 Doreian, P. (1980) 'Linear models with spatially distributed data: spatial disturbances or  
694 spatial effects?', *Sociological Methods and Research* 9: 29–60.
- 695 Dow, M.M., Burton, M.L., White, D.R. and Reitz, K.P. (1984) 'Galton's problem as network  
696 autocorrelation', *American Ethnologist* 11: 754–70.
- 697 Dow, M.M., White, D.R. and Burton, M.L. (1983) 'Multivariate modeling with interdependent  
698 network data', *Behavior Science Research* 17: 216–45.
- 699 Edwards, A. L. (1953). 'The relationship between the judged desirability of a trait and the  
700 probability that the trait will be endorsed', *Journal of Applied Psychology*, 37: 90-93.
- 701 Elmer, T., Chaitanya, K., Purwar, P. et al. The validity of RFID badges measuring face-to-face  
702 interactions. *Behav Res* 51, 2120–2138 (2019). <https://doi.org/10.3758/s13428-018-1180-y>
- 703 Franken, R., Bekhuis, H., & Tolsma, J. (2023). Kudos make you run! How runners influence  
704 each other on the online social network Strava. *Social Networks*, 72, 151-164.
- 705 Freeman L C (1979). 'Centrality in Social Networks: Conceptual clarification', *Social Networks*  
706 1, 215-239.
- 707 Gayen, K. and Raeside, R., Social networks and contraception practice of women in rural  
708 Bangladesh. *Social Science & Medicine* 71, 9: 1584-1592 (2010).  
709 <https://doi.org/10.1016/j.socscimed.2010.08.002>.
- 710 Gosling, R., Chimumbwa, J., Uusiku, P. et al. District-level approach for tailoring and targeting  
711 interventions: a new path for malaria control and elimination. *Malar J* 19, 125 (2020).

- 712 <https://doi.org/10.1186/s12936-020-03185-w>
- 713 Granovetter, M. Threshold models of collective behavior. *AJS* 83, 6: 1420-1443 (1978).
- 714 Gulland, A. WHO urges countries in dengue belt to look out for Zika. *BMJ* 352:i595, (2016).
- 715 de la Haye, K., Shin, H., Vega Yon, G. G., & Valente, T. W. (2019). Smoking diffusion through  
716 networks of diverse, urban american adolescents over the high school period. *Journal of*  
717 *Health and Social Behavior*, 60(3), 362-376.
- 718 Hogan, B., Janulis, P., Phillips, G., Melville, J., Mustanski, B., Contractor, N., & Birkett, M.  
719 (2020). Assessing the stability of egocentric networks over time using the digital participant-  
720 aided sociogram tool Network Canvas. *Network Science*, 8(2), 204-222.  
721 doi:10.1017/nws.2019.27
- 722 Hollway, James, Alessandro Lomi, Francesca Pallotti, and Christoph Stadtfeld. "Multilevel  
723 social spaces: The network dynamics of organizational fields." *Network Science* 5, no. 2  
724 (2017): 187-212.
- 725 Holly, B.S., Christakis, N.A., and Fowler J.H. Association Between Social Network Communities  
726 and Health Behavior: An Observational Sociocentric Network Study of Latrine Ownership in  
727 Rural India. *American Journal of Public Health* 104, 930-937 (2014).  
728 <https://doi.org/10.2105/AJPH.2013.301811>
- 729 Horsevad, N., Mateo, D., Kooij, R.E. et al. Transition from simple to complex contagion in  
730 collective decision-making. *Nat Commun* 13, 1442 (2022). [https://doi.org/10.1038/s41467-](https://doi.org/10.1038/s41467-022-28958-6)  
731 [022-28958-6](https://doi.org/10.1038/s41467-022-28958-6)
- 732 Kessler A., van Eijk A. M., Limalemla J., Walton C., Carlton J. M., Albert S., Malaria in  
733 Meghalaya: a systematic literature review and analysis of data from the National Vector-  
734 Borne Disease Control, *Malar J* 17:411 (2018) <https://doi.org/10.1186/s12936-018-2563-3>
- 735 Kessler, A., Shylla, B., Singh, U.S. et al. Spatial and temporal village-level prevalence of  
736 Plasmodium infection and associated risk factors in two districts of Meghalaya, India. *Malar J*  
737 20, 70 (2021). <https://doi.org/10.1186/s12936-021-03600-w>
- 738 Kim, D.A., Hwong, A.R., Stafford, D., Hughes, D.A., O'Malley, A.J., Fowler, J.H., Christakis, N.A.  
739 Social network targeting to maximise population behaviour change: a cluster randomised  
740 controlled trial. *Lancet*. 386(9989):145-53 (2015). doi: 10.1016/S0140-6736(15)60095-2.
- 741 Kossinets, G., Effects of missing data in social networks. *Social Networks* 28, 3: 247-268  
742 (2006). <https://doi.org/10.1016/j.socnet.2005.07.002>.
- 743 Koster, J. Interhousehold Meat Sharing among Mayangna and Miskito Horticulturalists in  
744 Nicaragua. *Hum Nat* 22, 394–415 (2011). <https://doi.org/10.1007/s12110-011-9126-4>
- 745 Landsberger, H. A. (1958). Hawthorne Revisited. Ithaca. OCLC 61637839.
- 746 Lazega, E., & Snijders, T. A. (Eds.). (2015). *Multilevel network analysis for the social sciences:*  
747 *Theory, methods and applications* (Vol. 12). Springer.

- 748 Leenders, T.T.A.J. (2002) 'Modeling social influence through network autocorrelation:  
749 constructing the weight matrix', *Social Networks* 24: 21–47.
- 750 Lek, D., Callery, J.J., Nguon, C. et al. Tools to accelerate falciparum malaria elimination in  
751 Cambodia: a meeting report. *Malar J* 19, 151 (2020). [https://doi.org/10.1186/s12936-020-](https://doi.org/10.1186/s12936-020-03197-6)  
752 [03197-6](https://doi.org/10.1186/s12936-020-03197-6)
- 753 Lele, N., Joshi, P.K. Analyzing deforestation rates, spatial forest cover changes and identifying  
754 critical areas of forest cover changes in North-East India during 1972–1999. *Environ Monit*  
755 *Assess.*56:159–70 (2009).
- 756 Levy, D. E. et al. Social connections and the healthfulness of food choices in an employee  
757 population. *Nature human behaviour* 5,10: 1349-1357 (2021). doi:10.1038/s41562-021-  
758 01103-x
- 759 Long, E., & Valente, T. W. (2019). Perceived social acceptability and longitudinal trends in  
760 adolescent cigarette smoking. *Prevention Science*, 20, 824-832.
- 761 Lospinoso, Josh, and Tom AB Snijders. "Goodness of fit for stochastic actor-oriented models."  
762 *Methodological Innovations* 12, no. 3 (2019): 2059799119884282.
- 763 Marsden P. V, Egocentric and sociocentric measures of network centrality, *Social Networks*,  
764 Volume 24, Issue 4, 2002, Pages 407-422, [https://doi.org/10.1016/S0378-8733\(02\)00016-3](https://doi.org/10.1016/S0378-8733(02)00016-3).
- 765 Matin, M.A., Sarkar, N.D.P., Phru, C.S., Ley, B., Thriemer, K., Price, R.N., Peeters Grietens, K.,  
766 Ali Khan, W., Alam, M.S., Gryseels, C. Precarity at the Margins of Malaria Control in the  
767 Chittagong Hill Tracts in Bangladesh: A Mixed-Methods Study. *Pathogens*. 14;9(10):840  
768 (2020). doi: 10.3390/pathogens9100840.
- 769 Ministry of Tribal Affairs. Demographic status of scheduled tribe population of India. 2013.  
770 *Government of India*. <http://www.tribal.gov.in>. Accessed 18 August 2021.
- 771 Mishra, A.K., Nisar, S., Rajvanshi, H. et al. Improvement of Indoor Residual Spraying and Long-  
772 Lasting Insecticidal Net services through structured monitoring and supervision as part of the  
773 Malaria Elimination Demonstration Project in Mandla, Madhya Pradesh. *Malar J* 20, 101  
774 (2021). <https://doi.org/10.1186/s12936-021-03639-9>
- 775 Musoke, D., Atusingwize, E., Namata, C. et al. Integrated malaria prevention in low- and  
776 middle-income countries: a systematic review. *Malar J* 22, 79 (2023).  
777 <https://doi.org/10.1186/s12936-023-04500-x>
- 778 Nlinwe, N.O., Singong, Y.C., Florentine, T.M.R. Evaluation of malaria preventive measures  
779 among adult patients attending the Bamendjou and Fombot district hospitals of the West  
780 Region of Cameroon. *Malar J*. 22;20(1):60. (2021 ) doi: 10.1186/s12936-021-03592-7.
- 781 Ord, K. (1975) Estimation methods for models of spatial interaction', *Journal of the American*  
782 *Statistical Association* 70: 120–26.
- 783 Passah, M., Nengnong, C.B., Wilson, M.L., Carlton, J.M., Kharbamon, L., Albert, S.  
784 Implementation and acceptance of government-sponsored malaria control interventions in

- 785 Meghalaya, India. *Malar J.* 21(1):200 (2022).
- 786 Perkins J. M., Subramanian S.V., Christakis N. A., Social networks and health: A systematic  
787 review of sociocentric network studies in low- and middle-income countries, *Social Science &*  
788 *Medicine*, Volume 125, 2015, Pages 60-78, <https://doi.org/10.1016/j.socscimed.2014.08.019>.
- 789 PIB 2020, <https://pib.gov.in/pressreleaseiframepage.aspx?prid=1677601> Accessed  
790 22/07/2022
- 791 Proestakis, A., di Sorrentino, E.P., Brown, H.E. *et al.* Network interventions for changing  
792 physical activity behaviour in preadolescents. *Nat Hum Behav* 2, 778–787 (2018).  
793 <https://doi.org/10.1038/s41562-018-0436-y>
- 794 Rajagopal, R. Studies on persistent transmission of malaria in Burnihat, Meghalaya. *J Commun*  
795 *Dis.* 8:235–45 (1976).
- 796 Ripley, R. M., Snijders, T. A. B., Boda, Z., Vörös, A. & Preciado, P. Manual for RSiena (v. 1.3.6).  
797 (2022).
- 798 Rogers Everett, M. *Diffusion of Innovations*. New York: Free Press (1962).
- 799 Rubio-Palis Y., Curtis C. F.. Biting and resting behaviour of anophelines in western Venezuela  
800 and implications for control of malaria transmission, *Medical and Veterinary Entomology*, 6,  
801 325–334 (1992). <https://doi.org/10.1111/j.1365-2915.1992.tb00628.x>
- 802 Sahu SS, Thankachy S, Dash S, Nallan K, Swaminathan S, Kasinathan G, et al. Evaluation of  
803 long-lasting indoor residual spraying of deltamethrin 62.5 SC-PE against malaria vectors in  
804 India. *Malar J.* 2020. <https://doi.org/10.1186/s12936-020-3112-4>.
- 805 Salvy, S.J., de la Haye, K., Bowker, J. C., & Hermans, R. C. J. Influence of peers and friends on  
806 children’s and adolescents’ eating and activity behaviors. *Physiology & Behavior*, 106, 369–  
807 378 (2012). <https://doi.org/10.1016/j.physbeh.2012.03.022>.
- 808 Sangoro, P. Can repellents prevent malaria in Tanzania? PhD thesis, London School of  
809 Hygiene & Tropical Medicine (2015). DOI: <https://doi.org/10.17037/PUBS.02374474>
- 810 Sarkar, R., Kessler, A., Mawkhlieng, B. et al. Household and individual level risk factors  
811 associated with declining malaria incidence in Meghalaya, India: implications for malaria  
812 elimination in low-endemic settings. *Malar J* 20, 460 (2021). [https://doi.org/10.1186/s12936-](https://doi.org/10.1186/s12936-021-03982-x)  
813 [021-03982-x](https://doi.org/10.1186/s12936-021-03982-x)
- 814 Shahandeh, K., Basseri, H. & Shojaeizadeh, E. Using the cultural model to plan intervention  
815 for malaria control in immigrants and native communities in endemic area, earmarked for  
816 malaria elimination southeastern Iran. *Malar J* 11, P132 (2012).  
817 <https://doi.org/10.1186/1475-2875-11-S1-P132>
- 818 Sharma, R.K., Thakor, H.G., Saha, K.B., Sonal, G.S., Dhariwal, A.C., Singh, N. Malaria situation  
819 in India with special reference to tribal areas. *Indian J Med Res.* 141:537–45 (2015).
- 820 Shepard, D.S., Undurraga, E.A., Betancourt-Cravioto, M., Guzman, M.G., Halstead, S.B., Harris,  
821 E., et al. Approaches to refining estimates of global burden and economics of dengue. *PLoS*

- 822 *Negl Trop Dis.* 8(11):e3306 (2014).
- 823 Simpson, C.R. Social Support and Network Formation in a Small-Scale Horticulturalist  
824 Population. *Sci Data* 9, 570 (2022). <https://doi.org/10.1038/s41597-022-01516-x>
- 825 Smith, K.P. and Christakis, N.A. Social Networks and Health. *Annual Review of Sociology* 34:1,  
826 405-429 (2008).
- 827 Snijders, Tom A.B. (1996) Stochastic actor-oriented models for network change. *Journal of*  
828 *Mathematical Sociology*, 21, 149-172.
- 829 Snijders, T. A. B. & Steglich, C. E. G. Representing Micro–Macro Linkages by Actor-based  
830 Dynamic Network Models. *Sociol. Methods Res.* 44, 222–271 (2015).
- 831 Snijders, T.A.B., Steglich, C.E.G. and Van de Bunt, G.G. (2010) ‘Introduction to actor-based  
832 models for network dynamics’, *Social Networks* 32: 44–60.
- 833 Snijders, T. A. B., & Bosker, R. J. (2012). *Multilevel Analysis: An Introduction to Basic and*  
834 *Advanced Multilevel Modeling*. 2nd Edition. Sage, London.
- 835 Stadfeld, C., & Amati, V. (2021). Network mechanisms and network models. In *Research*  
836 *Handbook on Analytical Sociology* (pp. 432-452). Edward Elgar Publishing.
- 837 Steglich, C., Snijders, T. A., & Pearson, M. (2010). 8. Dynamic networks and behavior:  
838 separating selection from influence. *Sociological Methodology*, 40(1), 329-393.
- 839 Stoebenau, K., Valente, T.W. Using network analysis to understand community-based  
840 programs: a case study from highland Madagascar. *Int Fam Plan Perspect.* 29(4):167-73  
841 (2003). doi: 10.1363/ifpp.29.167.03. PMID: 14665425..
- 842 Valente, T. W., & Pumpuang, P. (2007). Identifying Opinion Leaders to Promote Behavior  
843 Change. *Health Education & Behavior*, 34(6), 881–896.  
844 <http://www.jstor.org/stable/45055988>
- 845 Valente, T.W. Social network thresholds in the diffusion of innovations. *Social Networks*, 18,  
846 1, 69-89 (1996). [https://doi.org/10.1016/0378-8733\(95\)00256-1](https://doi.org/10.1016/0378-8733(95)00256-1).
- 847 Valente, Thomas W., *Social Networks and Health: Models, Methods, and Applications* (New  
848 York, 2010; online edn, Oxford Academic, 1 May 2010).
- 849 Valente, T.W., Fujimoto, K., Chou, C.P., Spruijt-Metz, D. Adolescent Affiliations and Adiposity:  
850 A Social Network Analysis of Friendships and Obesity. *J Adol Health* 45:202-204 (2009).
- 851 Van Eijk, A.M. et al. The use of mosquito repellents at three sites in India with declining  
852 malaria transmission: surveys in the community and clinic. *Parasites & vectors* vol. 9,1 418.  
853 (2016), doi:10.1186/s13071-016-1709-9
- 854 Verelst, F., Willem, L. & Beutels, P. Behavioural change models for infectious disease  
855 transmission: a systematic review (2010-2015). *J. R. Soc. Interface* (2016).  
856 <https://doi.org/10.1098/rsif.2016.0820>



- 857 Viechtbauer, W. (2010). Conducting meta-analyses in R with the metafor package. *Journal of*  
858 *Statistical Software*, **36**(3), 1–48. <https://doi.org/10.18637/jss.v036.i03>
- 859 Vörös András, Zsófia Boda, Timon Elmer, Marion Hoffman, Kieran Mepham, Isabel J. Raabe,  
860 Christoph Stadtfeld, The Swiss StudentLife Study: Investigating the emergence of an  
861 undergraduate community through dynamic, multidimensional social network data, *Social*  
862 *Networks*, Volume 65, 2021, Pages 71-84, ISSN 0378-8733,  
863 <https://doi.org/10.1016/j.socnet.2020.11.006>.
- 864 Watts, D. J. & Strogatz, S. H. Collective dynamics of ‘small-world’ networks. *Nature* 393, 440–  
865 442 (1998).
- 866 Weston, D., Hauck, K. & Amlôt, R. Infection prevention behaviour and infectious disease  
867 modelling: a review of the literature and recommendations for the future. *BMC Public Health*  
868 18, 336 (2018).
- 869 WHO. Global technical strategy for malaria 2016–2030. Geneva: World Health Organization  
870 (2015).
- 871 WHO. World malaria report 2022. Geneva: World Health Organization; 2022. Licence: CC BY-  
872 NC-SA 3.0 IGO
- 873 Wilson, A.L., Chen-Hussey, V., Logan, J.G., Lindsay, S.W. Are topical insect repellents effective  
874 against malaria in endemic populations? A systematic review and meta-analysis. *Malar J.* 21:  
875 446 (2014). doi: 10.1186/1475-2875-13-446.
